# Supplementary material
Source: PubMed Central journal article supplement (PMC3000756)
Supplement: supp_17.6.637_LAU.pdf [file supp_17.6.637_LAU.pdf]

Table 1 – Synopsis of Reviews by Topic Area

| Topic                 | Authors                                                                                             | HIS Features                                                         | Settings                                                         | Study Designs                                                       | Evaluation Metrics                                                                                                                       | Key Findings                                                                                                                                              |
|-----------------------|-----------------------------------------------------------------------------------------------------|----------------------------------------------------------------------|------------------------------------------------------------------|---------------------------------------------------------------------|------------------------------------------------------------------------------------------------------------------------------------------|-----------------------------------------------------------------------------------------------------------------------------------------------------------|
| Medication Management | Ammenwerth 2008 <sup>24</sup> Austria                                                               | ePrescribing CPOE +/- CDS for medication errors, adverse drug events | Hospitals, medical centre, primary care                          | 27 studies: controlled cohorts - pre/post, RCT                      | Relative risks in medication errors and adverse drug events                                                                              | 23/25 studies had significant relative risk reduction for medication errors                                                                               |
| Medication Management | Bennett 2003 Australia <sup>16</sup>                                                                | Medication reminders, feedback for providers and patients            | Hospitals, outpatient clinics, pharmacy, general practices       | 26 studies: RCT                                                     | Relative compliance rates for providers on reminders/feedback, and patients on feedback                                                  | Reminders more effective in medication management by physicians; improve adherence by patients                                                            |
| Medication Management | Chatellier 1998 <sup>21</sup> (also medinfo 98) France                                              | ePrescribing and drug dosing of anticoagulants                       | Not reported                                                     | 9 studies: RCT                                                      | Odds ratios for proportion of days within range, outcome as thrombotic events, haemorrhage, death                                        | 29% increase in appropriate therapy; less frequent hemorrhagic events                                                                                     |
| Medication Management | Durieux 2008 <sup>28</sup> France; also Walton 1999 <sup>67</sup> 2001 <sup>68</sup> United Kingdom | Drug dose advice                                                     | Inpatient, outpatient settings                                   | 23 studies: RCT, CT, time series                                    | Risk ratios, mean differences in drug dose, serum level, therapeutic range, time to/in range, adverse drug events, death, length of stay | Reduced time to therapeutic range, length of stay, toxicity; improved initial dose and level                                                              |
| Medication Management | Eslami 2007 <sup>29</sup> Netherlands                                                               | CPOE medication order +/- CDS/alerts                                 | outpatient settings                                              | 30 studies: RCT, CT, observational                                  | Medication adherence, alerts, safety, time, costs, efficiency; usability, use and satisfaction                                           | 6/11 studies positive adherence, 1/4 improved medication errors; negative for time, alerts; mixed satisfaction, use                                       |
| Medication Management | Eslami 2008 <sup>30</sup> Netherlands                                                               | CPOE medication order +/- CDS/alerts                                 | Inpatient settings                                               | 67 studies: RCT, CT, observational                                  | Medication adherence, alerts, safety, time, costs, efficiency; usability, use and satisfaction                                           | Improved adherence and safety; mixed on cost, efficiency, alerts; increased physician time                                                                |
| Medication Management | Fitzmaurice 1998 <sup>31</sup> United Kingdom                                                       | CDS for oral anticoagulation therapy                                 | Primary care                                                     | 7 studies: 1 RCT, others not mentioned                              | Therapeutic range comparison; lacks detail                                                                                               | Improved therapeutic control shown                                                                                                                        |
| Medication Management | Handler 2007 <sup>34</sup> United States                                                            | Pharmacy/lab event monitoring for adverse drug event                 | Teaching/community hospitals, medical centre                     | 12 studies: not specified                                           | Positive predictive values for 15 signals: 3 antidotes, 8 lab results, 4 medication levels                                               | Positive predictive values lowest for antidotes then lab values then medication levels; should prioritize signals with highest positive predictive values |
| Medication Management | Kaushal 2003 <sup>40</sup> United States                                                            | CPOE +/- CDS medication orders and drug dosing                       | Inpatient                                                        | 12 Studies: RCT, CT, pre/post, time series                          | Rates of medication errors, adverse drug event, drug dose frequency/level, prescribing practice, corollary orders                        | CPOE had reduced errors, improved drug dose frequency or prescribing practice; 4/7 CDS had reduced medication errors                                      |
| Medication Management | Oren 2003 <sup>46</sup> United States                                                               | CPOE, barcoding, automated dispensing, medication admin record       | Institutions, nursing units, ambulatory care pharmacy, no detail | CPOE 11, barcode 7, dispensing 7: controlled, pre/post, time series | Rates of medication use, entry, error, adverse drug event, order time, cost, on-schedule, dispensing                                     | CPOE, barcode and dispensing reduced errors; CPOE improved medication use, cost but increased order time                                                  |
| Medication Management | Shebl 2007 <sup>52</sup> United Kingdom                                                             | CDS in prescribing antibiotic use                                    | Hospitals, primary care                                          | 10 studies; RCT, pre/post                                           | Antibiotic use frequency, duration, dose, rate, cost, adverse drug event, adjustment, post-op infection; length of stay, mortality       | 8/10 (80%) studies showed significant benefits in CDS use                                                                                                 |
| Medication Management | Van der Sijs 2006 <sup>59</sup> Netherlands                                                         | CPOE +/- CDS prescribing and drug dosing                             | Hospitals, clinics, general practitioners, primary care          | 17 studies: RCT, survey, focus group, interview, order analysis     | Rates/types of alert and override; override reasons                                                                                      | Improve alert specificity, sensitivity, info content, override handling, latent conditions; reduce workflow disruption                                    |
| Medication Management | Wolfstadt 2008 <sup>60</sup> Canada                                                                 | CPOE in alerts and overrides                                         | hospitals, ambulatory care                                       | 10 studies; pre/post, time series, x-sectional                      | Relative rates of adverse drug events                                                                                                    | Significant adverse drug event decrease in 5 studies, non-significant decrease in 4                                                                       |
| Preventive Care       | Austin 1994 <sup>27</sup> United States                                                             | Reminders for preventive care                                        | Family/internal medicine clinic                                  | 4 studies: RCT                                                      | Odds ratios for compliance in cancer screening, tetanus immunization                                                                     | Reminders effective in cervical cancer screening and tetanus immunization                                                                                 |
| Preventive Care       | Buntinx 1993 <sup>18</sup> Belgium                                                                  | Reminders and feedback in provider performance                       | Medical centres, general practice                                | 26 studies: RCT, non-RCT, pre/post                                  | Rates of compliance, diagnostic test and cost                                                                                            | Feedback reduces test use, cost and compliance; reminders more effective                                                                                  |

Legends: RCT-randomized controlled trial; CT-controlled trial; CPOE-computerized provider order entry; CDS-computer decision support;

Table 1 – Synopsis of Reviews by Topic Area, continued

| Topic            | Authors                                         | HIS Features                                                                                                   | Settings                                                      | Study Designs                                                           | Evaluation Metrics                                                                                                                                                               | Key Findings                                                                                                                                                                  |
|------------------|-------------------------------------------------|----------------------------------------------------------------------------------------------------------------|---------------------------------------------------------------|-------------------------------------------------------------------------|----------------------------------------------------------------------------------------------------------------------------------------------------------------------------------|-------------------------------------------------------------------------------------------------------------------------------------------------------------------------------|
| Preventive Care  | Dexheimer 2008 <sup>26</sup><br>United States   | Reminders in preventive care                                                                                   | hospitals, medical centres, primary care                      | 61 studies: RCT                                                         | Odds ratios as percent difference for 16 preventive measures                                                                                                                     | Prompting clinicians had positive effects; limited by HIS use, behaviour                                                                                                      |
| Preventive Care  | Jimbo 2006 <sup>38</sup><br>United States       | Reminders for cancer prevention                                                                                | Academic, private, health maintenance org, primary care       | 30 studies: RCT, time series, pre/post                                  | Rates of compliance to reminders for breast, cervical, colorectal screening                                                                                                      | Modest increase in breast, colorectal and cervical cancer screening                                                                                                           |
| Preventive Care  | Shea 1996 <sup>31</sup><br>United States        | Reminders in preventive care                                                                                   | Ambulatory care                                               | 16 studies: RCT                                                         | Adjusted odds ratios for compliance in preventive practices                                                                                                                      | Improved breast/colorectal cancer screening, vaccination, cardiovascular risk reduction, not cervical or others                                                               |
| Health Condition | Balas 2004 <sup>32</sup><br>United States       | Prompts, home records for insulin adjustment, patient education                                                | Hospitals, outpatient clinics, primary care, teleconsultation | 44 studies: RCT                                                         | Effect size for hemoglobin A1c, blood glucose, insulin adjustment, compliance; cost, hospitalization, length of stay; satisfaction                                               | Prompting follow-ups, adjustment of insulin via home glucose records, remote feedback can improve care                                                                        |
| Health Condition | Colombet 1999 <sup>23</sup><br>France           | CDS – decision aids in triage of acute chest pain                                                              | Emergency room                                                | 11 studies: RCT, time series                                            | Sensitivity/specificity of decision aid; length of stay in intensive care unit                                                                                                   | 7/9 studies had reduced length of stay; slightly improved diagnostic performance                                                                                              |
| Health Condition | Dorr 2007 <sup>14</sup><br>United States        | CDS advice/info/prompts, results management, communication, CPOE, patient support, admin                       | Outpatients: primary and specialty care                       | 109 studies: experiment, observation, descriptive, review, case studies | Technical: usability, accuracy; care process: adherence, visit, referral, documentation, tests; outcome: lab values, hospitalization, quality of life, complication, assessments | 34/50 (67%) experimental studies had positive effects, correlated with EMR link, computer prompts, population management, scheduling, specialized CDS, personal health record |
| Health Condition | Jackson 2005 <sup>36</sup><br>United States     | Communication, disease management, telehealth, flowsheet, education                                            | Clinic, phone, web-based, teleconsult                         | 26 studies: RCT, CT, post-only, pre/post                                | Rates of hemoglobin A1c, visit, hospitalization, foot/eye exam, cost, satisfaction, behaviour, knowledge                                                                         | Most studies had positive results with improved healthcare use, behaviour, attitude, knowledge, skill                                                                         |
| Health Condition | Liu 2006 <sup>42</sup><br>United Kingdom        | Diagnostic aids for acute abdominal pain                                                                       | Inpatient, outpatient, emergency room                         | 32 studies: RCT, quasi-RCT                                              | Diagnostic accuracy as sensitivity, specificity, error rates, odds ratios                                                                                                        | Greater specificity and lower false-positive rates than doctors; can confirm acute appendicitis but not rule-out                                                              |
| Health Condition | Montgomery 1998 <sup>44</sup><br>United Kingdom | CDS in charting, recall, prescribing, feedback, reminders                                                      | Clinics, health centres, general practice                     | 7 studies: RCT                                                          | Rates in patient uptake, follow-up, blood pressure control; in physician recording, prescribing, knowledge                                                                       | Improved patient update, follow-up but not physician performance or blood pressure control                                                                                    |
| Health Condition | Sanders 2006 <sup>50</sup><br>United States     | CDS in compliance, drug dosing, patient data collection/survey and education, detection, diagnosis, monitoring | Outpatient, home and emergency room                           | 64 studies: descriptive, survey, RCT and CT as retro/prospective        | Change in compliance, symptoms, hospitalization, dose level, visit length, cost and patient self-care knowledge                                                                  | Improved rates in compliance and hospitalization; reduced rescue medications; improved prevention and patient self-care knowledge                                             |
| Health Condition | Sintchenko 2007 <sup>24</sup><br>Australia      | CDS consultation as drug dosing, prescribing, info, advice; critiquing as alerts, reminders                    | Hospitals and primary care                                    | 24 studies: RCT                                                         | Rates of therapies, adverse drug event, admissions, visits, length of stay, lab tests, compliance, assessments, mortality, morbidity                                             | 13/24 (54%) studies had improved clinical or surrogate outcomes; all were for acute vs. 38% for chronic conditions                                                            |
| Data Quality     | Byrne 2005 <sup>19</sup><br>United Kingdom      | Administrative registers in psychiatry                                                                         | Registries/database from 7 countries                          | 14 studies: descriptive only                                            | Accuracy/agreement of diagnosis vs. standards; sensitivity/specificity                                                                                                           | No gold standard; accuracy/agreement varies but generally favourable                                                                                                          |
| Data Quality     | Hogan 1997 <sup>35</sup><br>United States       | Electronic patient record                                                                                      | hospitals, clinics, health maintenance org, general practice  | 26 studies: sampling of EPR data vs. standard                           | Percent accuracy in correctness and completeness by data type                                                                                                                    | Accuracy fair to good, but variable by data type in completeness, correctness                                                                                                 |
| Data Quality     | Jordan 2004 <sup>39</sup><br>United Kingdom     | Morbidity register in general practice                                                                         | General practice office                                       | 24 studies: sampling comparison vs. standard                            | Percent completeness/correctness, sensitivity of morbidity register and consultation reporting                                                                                   | Quality of morbidity coding variable, and can be improved with training                                                                                                       |

Legends: RCT-randomized controlled trial; CT-controlled trial; CPOE-computerized provider order entry; CDS-computer decision support

Table 1 – Synopsis of Reviews by Topic Area, continued

| Topic                | Authors                                                                                                    | HIS Features                                                                                                 | Settings                                            | Study Designs                                              | Evaluation Metrics                                                                                                                                        | Key Findings                                                                                                                           |
|----------------------|------------------------------------------------------------------------------------------------------------|--------------------------------------------------------------------------------------------------------------|-----------------------------------------------------|------------------------------------------------------------|-----------------------------------------------------------------------------------------------------------------------------------------------------------|----------------------------------------------------------------------------------------------------------------------------------------|
| Data Quality         | Thiru 2003 <sup>56</sup><br>United Kingdom                                                                 | Electronic patient record data quality                                                                       | Primary care settings                               | 52 studies: descriptive surveys                            | Rate, predictive value, sensitivity, specificity of diagnostic/symptom, management, care vs. reference data                                               | Overall good validity, better prescribing than diagnosis/lifestyle data; sensitivity dependent on data type                            |
| Data Quality         | Thiru 2003 <sup>56</sup><br>United Kingdom                                                                 | Electronic patient record data quality                                                                       | Primary care settings                               | 52 studies: descriptive surveys                            | Rate, predictive value, sensitivity, specificity of diagnostic/symptom, management, care vs. reference data                                               | Overall good validity, better prescribing than diagnosis/lifestyle data; sensitivity dependent on data type                            |
| Care Process/Outcome | Balas 1996 <sup>8</sup><br>United States                                                                   | Reminders, feedback, info access, prediction, diagnosis, treatment                                           | Hospitals, outpatient primary/specialty care        | 98 studies: RCT - parallel and crossover                   | Ratios of provider prompt/reminder, treatment planner, info access, feedback, diagnosis, patient therapy                                                  | Provider prompt/reminder, treatment planner, patient education/therapy, patient prompt/reminder were effective                         |
| Care Process/Outcome | Bates 2003 <sup>45</sup><br>United States                                                                  | Adverse event monitors                                                                                       | Hospitals and primary care clinic                   | 25 studies; 8 had chart review as gold standard            | Accuracy/rate of adverse events for nosocomial infections, adverse drug events and falls in sensitivity, specificity, positive/negative predictive values | Events monitoring had variable success rates in detecting adverse events                                                               |
| Care Process/Outcome | Bryan 2008 <sup>17</sup><br>United States                                                                  | CDS in disease/medical management, prevention, drug dosing                                                   | Ambulatory/primary care                             | 17 studies: RCT/cluster, CT, observational                 | Compliance, medication use, test frequencies and values, reminders                                                                                        | 13/17 (76%) studies had positive outcomes - with 9 definite, 4 some                                                                    |
| Care Process/Outcome | Car 2008 <sup>20</sup><br>United Kingdom                                                                   | Info exchange, electronic health record, CDS, ePrescribing                                                   | Inpatient, outpatient, primary care settings        | 284 studies: RCT, CT; 67 reviews; others not reported      | Qualitative summaries of quality, safety and eHealth impacts                                                                                              | Electronic health record improved legibility, preventive care, analysis; HIS+CDS and ePrescribing improved performance e.g. compliance |
| Care Process/Outcome | Chaudhry 2006 <sup>22</sup> source <i>Shekelle'06</i> <sup>64</sup><br>United States                       | Reminders, clinical event monitoring, CPOE+/- CDS, ePrescribing, drug dosing                                 | Inpatient and outpatient settings                   | 257 studies: reviews, quantitative and qualitative studies | Rates of guideline adherence, clinical monitoring, medication errors, care utilization, provider time, cost                                               | Improved adherence, monitoring, medication errors, utilization; mixed on time, little cost; mainly 4 institutions                      |
| Care Process/Outcome | Cramer (Klassen) 2003 <sup>9</sup><br>Canada                                                               | Information on diagnosis, prediction, prevention, management, support, treatment                             | Inpatient, outpatient, home and conference settings | 67 studies: RCT, reviews                                   | Odd ratios and mean differences for evidence adherence, improved outcome and knowledge level                                                              | Some care process improved- diagnosis, management, prescription, prevention; mixed outcomes; improved knowledge                        |
| Care Process/Outcome | Delpierre 2004 <sup>25</sup><br>France                                                                     | EMR, CPOE, CDS, nursing care, ePrescribing with advice, info or reminders                                    | Inpatient, primary care                             | 26 studies: RCT, cross-sectional, pre/post, qualitative    | Rates/proportions/means for risk, compliance, treatment, test, time, length of stay, morbidity, attitude, satisfaction                                    | Improved satisfaction, preventive care; mixed care quality, patient outcomes                                                           |
| Care Process/Outcome | Garg 2005 <sup>10</sup><br><i>Updates Hunt 98</i> <sup>61</sup> <i>Johnston 94</i> <sup>62</sup><br>Canada | CDS in EMR/CPOE with feedback/prompts for diagnosis, prevention, drug dosing/prescribing, disease management | Inpatient, outpatient settings (no detail)          | 100 studies: RCT, CT                                       | Success defined as >= 50% outcome improvement across groups                                                                                               | 62/97 (64%) studies had improved performance; 7/52 (13%) had improved outcome; more success with automated prompts and CDS developers  |
| Care Process/Outcome | Georgiou 2007 <sup>53</sup><br>Australia                                                                   | CPOE +/- CDS for pathology services                                                                          | Hospitals, laboratory                               | 19 studies: RCT, CT, pre/post, time series, lab            | Test volume, cost, redundancy, time, compliance, phone calls, follow-up; adverse event rates, length of stay, total costs                                 | 10 impact assessment areas and 39 indicators on pathology services; CPOE benefit clinical/lab work process                             |
| Care Process/Outcome | Jerant 2000 <sup>37</sup><br>United States                                                                 | EMR reminders/prompts for preventive care                                                                    | Outpatient primary care                             | 16 studies: RCT and CT                                     | Compliance and hospitalization/visit rates; care scores; documentation, response and encounter time, remote EMR access                                    | Improved rates in documentation, response time and compliance; higher rates in reminder calls and letters; low remote access           |

Legends: RCT-randomized controlled trial; CT-controlled trial; CPOE-computerized provider order entry; CDS-computer decision support; EMR-electronic medical record

Table 1 – Synopsis of Reviews by Topic Area, continued

| Topic                | Authors                                                                             | HIS Features                                                                                         | Settings                                      | Study Designs                                | Evaluation Metrics                                                                                                                      | Key Findings                                                                                                                                      |
|----------------------|-------------------------------------------------------------------------------------|------------------------------------------------------------------------------------------------------|-----------------------------------------------|----------------------------------------------|-----------------------------------------------------------------------------------------------------------------------------------------|---------------------------------------------------------------------------------------------------------------------------------------------------|
| Care Process/Outcome | Kawamoto 2005 <sup>41</sup> <i>update</i> 2007 <sup>63</sup><br>United States       | CDS with CPOE, charting, prescribing, reminders, advice, feedback                                    | Academic, outpatient and multi-site settings  | 70 studies: RCT                              | Rate difference and adjusted odds ratios by CDS feature for compliance, follow-up, drug use                                             | Improved practice if CDS is computer-based, part of workflow, actionable, at time/location of decision making                                     |
| Care Process/Outcome | Mitchell 2001 <sup>43</sup> <i>also Sullivan 95</i> <sup>65</sup><br>United Kingdom | CPOE in prescribing, test orders, reminders, charting                                                | Primary care settings                         | 89 studies: RCT, CT, pre/post                | Rates in compliance, prescribing, cost, consult report content, time; outcomes as parameter in-range, referral, service, satisfaction   | Improved performance especially in health promotion; unclear in outcomes                                                                          |
| Care Process/Outcome | Nies 2006 <sup>15</sup><br>France                                                   | CDS for CPOE, reminders, advice, prescription/drug dosing                                            | Not mentioned                                 | 106 studies; RCT/cluster, controlled cohorts | Statistical significance in guideline compliance, patient outcomes - care, prescribing, risk factors, reminders                         | CDS more successful if system initiated, has corollary actions, with less user data entry and output control                                      |
| Care Process/Outcome | Poissant 2005 <sup>47</sup><br>Canada                                               | EHR documentation of notes, orders, referrals                                                        | Inpatient settings                            | 23 studies: RCT, post test-control, pre/post | Relative difference in documentation time of physicians and nurses                                                                      | Bedside/central computers saved nurse time but increased physician time                                                                           |
| Care Process/Outcome | Randell 2007 <sup>48</sup><br>United Kingdom                                        | CDS for drug dosing, phone triage, glucose regulation                                                | Intensive and primary care, telephone triage  | 8 studies; RCT, CT, time series, pre/post    | Relative risks in glucose regulation, anticoagulation care, nurse triage                                                                | CDS effects on nursing performance and patient outcomes inconsistent                                                                              |
| Care Process/Outcome | Rothschild 2004 <sup>49</sup><br>United States                                      | CPOE +/- CDS in reminders, info, advice, prescribing                                                 | General inpatient and intensive care settings | 18 studies: pre/post, RCT, time series       | Rates/proportions: medication error, frequency, duration; compliance; lab test/value; charge and length of stay                         | Improved medication error, antibiotic therapy, compliance, testing, cost                                                                          |
| Care Process/Outcome | Shiffman 1999 <sup>53</sup><br>United States                                        | Guideline alerts/advice, reminders; explanation; charting; communication; registration; presentation | Hospitals, general practices                  | 20 studies: RCT, CT, time series             | Rates of guideline adherence, cost, event documentation, satisfaction                                                                   | Improved adherence in 14/18 (78%) studies, documentation in 4/4 studies                                                                           |
| Care Process/Outcome | Tan 2008 <sup>55</sup> from 2005 report <sup>66</sup><br>United Kingdom             | CDS in drug prescribing, physiologic monitoring                                                      | Inpatient neonatal units                      | 3 studies; RCT                               | Relative risks in mortality/morbidity; mean difference in colloid use, blood gas, drug dose calculation time/error                      | Inconclusive on CDS benefit for newborn use                                                                                                       |
| Care Process/Outcome | Urquhart 2008 <sup>57</sup><br>United Kingdom                                       | Nursing record systems for charting with notes, +/- care plans, client-held                          | Hospital, community and primary care          | 9 studies; RCT, pre/post                     | Pain management, empowerment, loss of notes, data entry time/errors, amount of paper                                                    | Reduced lost notes, paper and data entry time; uncertain improvement in nursing practice or patient outcome                                       |
| Care Process/Outcome | van der Kam 2000 <sup>58</sup><br>Netherlands                                       | Electronic communication of information, e.g. lab results, consult letters                           | General practice                              | 30 studies; design not reported              | Communication speed, content and process; quality of care; costs; workload; physician appreciation; confidentiality; hospital adherence | Demonstrated effects: 3 papers with subjective data; 5 with objective data; 25 papers reported positive effects, 4 also negative, 1 negative only |

Legends: RCT-randomized controlled trial; CT-controlled trial; CPOE-computerized provider order entry; CDS-computer decision support; EMR-electronic medical record
